# Supplementary material for: Surface mediated l-phenylalanyl-l-phenylalanine assembly into large dendritic structures
Source: Royal Society of Chemistry journal article supplement (doi:10.1039/c3fd00065f), 2013-01-01
Supplement: c3fd00065f.pdf [file c3fd00065f.pdf]

Supplementary information

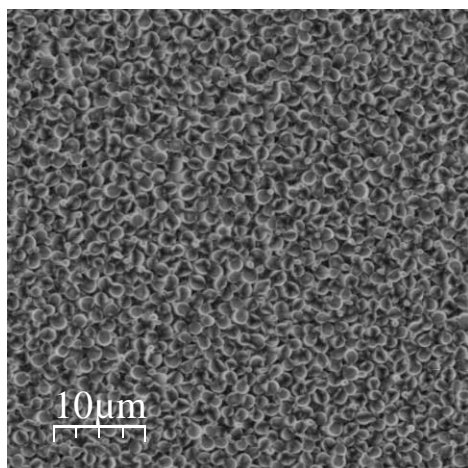

Figure 1 AFM image of phe-phe spin casted at mica surface. 10mg/ml phe-phe in HFIP

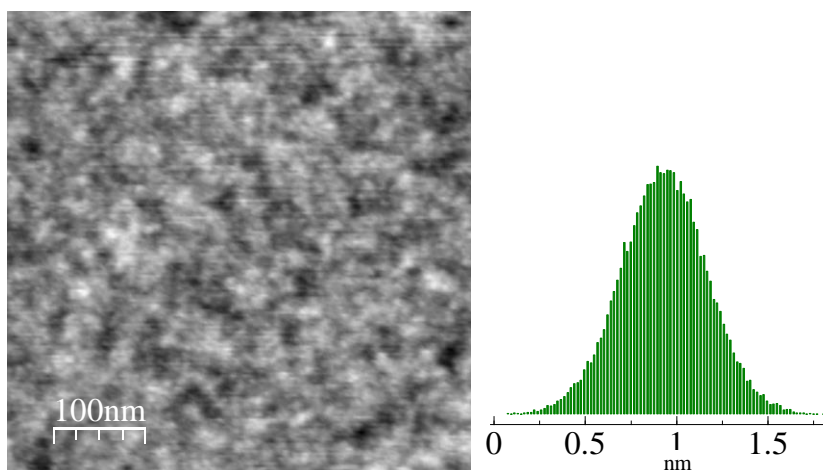

Figure 2 Height image of standard Si-wafer and roughness distribution.
